# Overexpression of SET $\beta$ , a protein localizing to centromeres, causes precocious separation of chromatids during the first meiosis of mouse oocytes

Shu-Tao Qi<sup>1,2</sup>, Zhen-Bo Wang<sup>1</sup>, Ying-Chun Ouyang<sup>1</sup>, Qing-Hua Zhang<sup>1</sup>, Meng-Wen Hu<sup>1,2</sup>, Xin Huang<sup>1</sup>, Zhaojia Ge<sup>1,2</sup>, Lei Guo<sup>1,2</sup>, Ya-Peng Wang<sup>1,2</sup>, Yi Hou<sup>1</sup>, Heide Schatten<sup>3</sup> and Qing-Yuan Sun<sup>1,\*</sup>

<sup>1</sup>State Key Laboratory of Reproductive Biology, Institute of Zoology, Chinese Academy of Sciences, Beijing 100101, China

<sup>2</sup>Graduate School, Chinese Academy of Sciences, Beijing 100101, China

<sup>3</sup>Department of Veterinary Pathobiology, University of Missouri, Columbia, MO 65211, USA

\*Author for correspondence (sunqy@ioz.ac.cn)

Accepted 28 January 2013

Journal of Cell Science 126, 1595–1603

© 2013. Published by The Company of Biologists Ltd

doi: 10.1242/jcs.116541

## Summary

Chromosome segregation in mammalian oocyte meiosis is an error-prone process, and any mistake in this process may result in aneuploidy, which is the main cause of infertility, abortion and many genetic diseases. It is now well known that shugoshin and protein phosphatase 2A (PP2A) play important roles in the protection of centromeric cohesion during the first meiosis. PP2A can antagonize the phosphorylation of rec8, a member of the cohesin complex, at the centromeres and thus prevent cleavage of rec8 and so maintain the cohesion of chromatids. SET $\beta$  is a protein that physically interacts with shugoshin and inhibits PP2A activity. We thus hypothesized that SET $\beta$  might regulate cohesion protection and chromosome segregation during oocyte meiotic maturation. Here we report for the first time the expression, subcellular localization and functions of SET $\beta$  during mouse oocyte meiosis. Immunoblotting analysis showed that the expression level of SET $\beta$  was stable from the germinal vesicle stage to the MII stage of oocyte meiosis. Immunofluorescence analysis showed SET $\beta$  accumulation in the nucleus at the germinal vesicle stage, whereas it was targeted mainly to the inner centromere area and faintly localized to the interchromatid axes from germinal vesicle breakdown to MI stages. At the MII stage, SET $\beta$  still localized to the inner centromere area, but could relocate to kinetochores in a process perhaps dependent on the tension on the centromeres. SET $\beta$  partly colocalized with PP2A at the inner centromere area. Overexpression of SET $\beta$  in mouse oocytes caused precocious separation of sister chromatids, but depletion of SET $\beta$  by RNAi showed little effects on the meiotic maturation process. Taken together, our results suggest that SET $\beta$ , even though it localizes to centromeres, might not be essential for chromosome separation during mouse oocyte meiotic maturation, although its forced overexpression causes premature chromatid separation.

**Key words:** SET $\beta$ , PP2A, Mouse oocyte, Meiosis, Centromere, Cohesion, Chromosome separation

## Introduction

Meiosis is a specific cell division cycle, which includes a single round of DNA replication, followed by two successive rounds of chromosome segregation (meiosis I and meiosis II). During meiosis I homologous chromosomes segregate while sister chromatids are still attached to each other; after meiosis II sister chromatids finally segregate (Lee and Orr-Weaver, 2001; Petronczki et al., 2003). Through this process, diploid parent cells generate haploid gametes. Chromosome segregation in mammalian oocyte meiosis is an error-prone process, and any mistake in this process may result in aneuploidy, which is the main cause of infertility, abortion and many genetic diseases (Cowchock et al., 1993; Hassold et al., 1996; Hassold and Hunt, 2001; Mailhes et al., 1998; Zenzes and Casper, 1992). To ensure the accuracy of chromosome segregation, a specific set of strict regulatory mechanisms has been developed in meiosis by organisms, one of which is the step-wise loss of cohesion on chromosome arms and centromeres (Yin et al., 2008b). In meiosis, the cohesion between homologous chromosomes and sister chromatids is maintained by the cohesin complex (Klein et al., 1999). The cohesin complex is a multisubunit complex containing SMC1, SMC3, rec8 and SCC3

(Gruber et al., 2003; Michaelis et al., 1997; Watanabe and Nurse, 1999), which forms a ring structure that entraps the sister chromatids to maintain the attachment of sister chromatids (Gruber et al., 2003; Nasmyth, 2002). During meiosis I, the rec8 subunits of the cohesin complex along chromosome arms are phosphorylated and then cleaved by a protease called separase (Buonomo et al., 2000; Lee et al., 2003), which leads to the segregation of homologous chromosomes. Meanwhile, the cohesin complex at the centromeres is protected from separase cleavage and maintains the attachment between sister chromatids until meiosis II (Lee et al., 2006). It is now well known that at least two protein families, shugoshin and protein phosphatase 2A (PP2A), play important roles in the protection of centromeric cohesion during first meiosis (Ishiguro et al., 2010; Kitajima et al., 2004; Kitajima et al., 2006; Lee et al., 2008; Yin et al., 2008a). Shugoshin and PP2A localize to centromeres in a bub1-dependent manner (Kitajima et al., 2005). PP2A can antagonize the phosphorylation of rec8-cohesin at the centromeres (Ishiguro et al., 2010; Kitajima et al., 2006; Lee et al., 2008; Riedel et al., 2006), in order to protect rec8 from cleavage by separase and thus keep the cohesion of chromatids.

Recently, it has been reported that a novel protein named SET $\beta$  can physically interact with shugoshin (Kitajima et al., 2006). SET $\beta$  inhibits PP2A, and it is thus also called I2PP2A (inhibitor 2 of PP2A). Its gene was originally identified as a fusion gene with the oncogene CAN in acute undifferentiated leukemia by translocation (Adachi et al., 1994). Later, some investigators found that SET $\beta$  was a histone chaperone involved in chromatin remodeling (Leung et al., 2011; Li and Damuni, 1998; Li et al., 1996). In addition, SET $\beta$  was found to be a subunit of the inhibitor of histone acetyltransferase (INHAT) (Seo et al., 2001), which can inhibit histone acetylation by acetyltransferase. It has been reported that SET $\beta$  collaborates with p21 (Cip1) to modulate cyclin-B-CDK1 activity and regulate the G2-M transition in COS and HCT116 cells (Canela et al., 2003). The most interesting feature of SET for our study is that it is a potent and specific inhibitor of PP2A (Li and Damuni, 1998; Li et al., 1996). Considering the role of shugoshin and PP2A in cohesion protection and chromosome separation, the direct interaction between shugoshin and SET $\beta$ , and the inhibitory effect of SET $\beta$  on PP2A, we hypothesized that SET $\beta$  regulates the meiotic process, especially centromeric cohesion and chromosome segregation. In this study, we explored for the first time the expression, localization and potential roles of SET $\beta$  in mouse oocyte meiosis. We found that SET $\beta$  was expressed stably and localized to the centromere during oocyte meiotic maturation. Overexpression of SET $\beta$  in mouse oocytes caused precocious segregation of sister chromatids in meiosis I, but knockdown of SET $\beta$  by siRNA had little effects on the meiotic process.

## Results

### Expression and localization of SET $\beta$ during mouse oocyte meiosis

To examine the expression level of SET $\beta$  during mouse oocyte meiotic maturation, oocytes were collected for western blot analysis after 0, 8 and 12 hours in culture, corresponding to the germinal vesicle (GV), first metaphase (MI) and second metaphase (MII) stages, respectively. The western blot results showed that the expression level of SET $\beta$  was stable from GV to MII stages (Fig. 1A).

Because of the lack of workable antibodies for immunofluorescent staining to investigate the subcellular localization of SET $\beta$  in whole oocytes, a low concentration of exogenous Myc-SET $\beta$  mRNA in nuclease-free water (about 0.4 mg/ml, 5–10 pl/oocyte) was injected into mouse oocytes at the GV stage. The oocytes were then cultured to different stages of meiotic maturation. The same amount of nuclease-free water was injected as a control. Anti-Myc antibody was used to detect the localization of Myc-SET $\beta$  for immunofluorescence microscopy. As shown in Fig. 1B, Myc-SET $\beta$  concentrated mainly in the germinal vesicle (nucleus) at the GV stage (Fig. 1Ba). From the germinal vesicle breakdown (GVBD) to MI stages, Myc-SET $\beta$  accumulated strongly around centromeres of chromosomes, with faint staining along the chromosome arms (Fig. 1Bb–d). At the MII stage, Myc-SET $\beta$  showed two different localization patterns: when oocytes were cultured for 12 hours (early MII), Myc-SET $\beta$  was localized only at the inner centromere area (Fig. 1Be), but when oocytes were cultured for 14 hours (late MII), Myc-SET $\beta$  was present at three points at both the inner centromere area and kinetochores (Fig. 1Bf). This

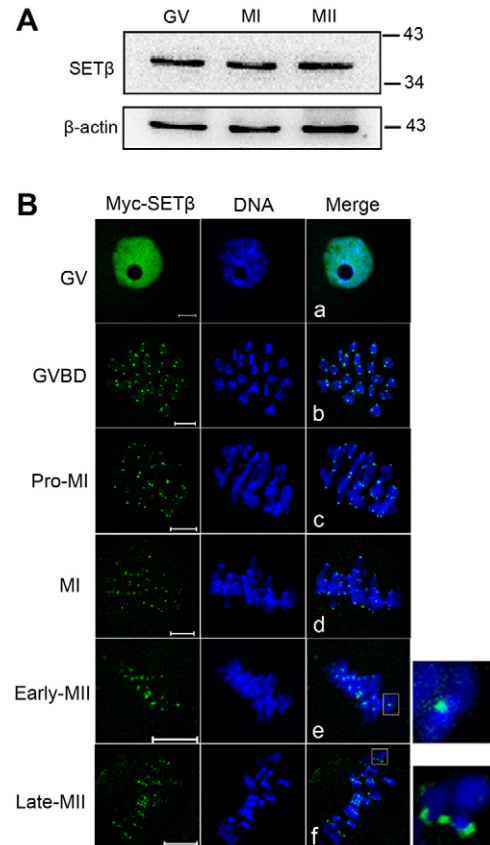

**Fig. 1.** (A) Expression of SET $\beta$  at GV, MI and MII stages. Samples (200 oocytes) were collected after oocytes had been cultured for 0, 8 and 12 hours, corresponding to GV, MI and MII stages respectively. Samples were immunoblotted for SET $\beta$  and  $\beta$ -actin. (B) Confocal microscopy showing the subcellular localization of Myc-SET $\beta$  (green) in mouse oocytes at GV, GVBD, Pro-MI, MI, Early-MII and Late-MII stages. DNA (blue) was counterstained with Hoechst 33342. Magnifications of the boxed regions are shown on the right. Scale bars: 10  $\mu$ m.

may indicate that Myc-SET $\beta$  can relocate from the inner centromere area to kinetochores.

To obtain more detailed information on the SET $\beta$  localization, we employed a new method of immunofluorescence analysis after chromosome spreading (Hodges and Hunt, 2002). By using this method, we successfully detected the localization of SET $\beta$  on chromosomes with the SET $\beta$  antibody that did not work in the previous immunofluorescence analysis in intact 4% paraformaldehyde-fixed oocytes. We found that at the MI stage, when all homologous chromosomes formed bivalents, strong staining of SET $\beta$  was detected at the inner centromere and faint staining was detected along the interchromatid axes (Fig. 2A). At the MII stage, clear SET $\beta$  signal was detected at both the inner centromere area and kinetochores (Fig. 2B), as a three-point signal. Faint SET $\beta$  signals were detected along chromatid arms. We also detected localization of Myc-SET $\beta$  on both MI and MII chromosomes after Myc-SET $\beta$  mRNA injection. The localization patterns were the same as those detected with SET $\beta$  antibody (Fig. 2C,D). All the results detected by both SET $\beta$  antibody and Myc-SET $\beta$  in oocytes and chromosomes confirmed the centromeric localization of SET $\beta$  in mouse oocytes.

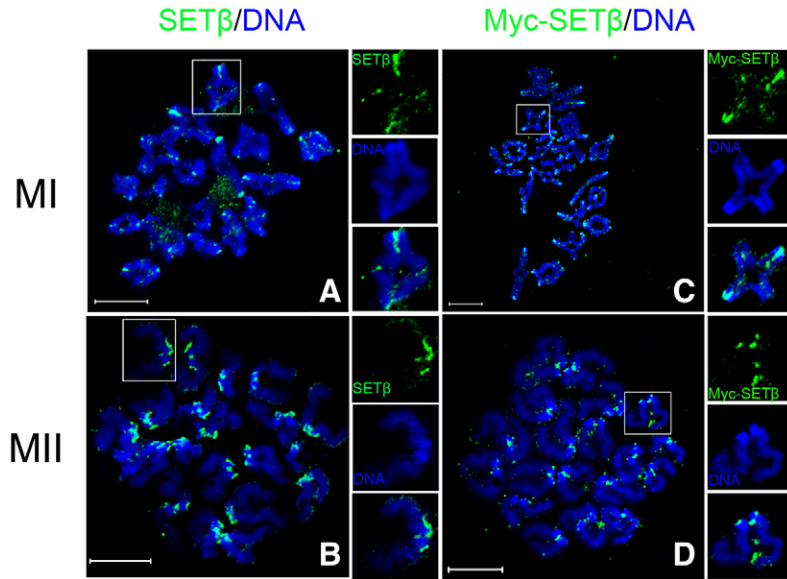

**Fig. 2. The localization of SET $\beta$  and Myc-SET $\beta$  on chromosome spreads at MI and MII stages.** Oocytes at MI and MII stages were used for chromosome spreading, and then stained with anti-SET $\beta$  antibody (green) and Hoechst 33342 (blue). Oocytes were injected with a low concentration of Myc-SET $\beta$  mRNA and cultured to MI and MII stages, then chromosomes were spread and stained with anti-Myc antibody (green) and Hoechst 33342 (blue). Magnifications of the boxed regions are shown on the right of each main panel. Scale bars: 10  $\mu$ m.

#### Colocalization of SET $\beta$ with CREST, Bub3 and PP2A

To further define the centromeric localization of SET $\beta$ , Myc-SET $\beta$  mRNA was injected into oocytes that were then cultured to different stages, fixed and double stained with CREST (anti-centromere antibody) and anti-Myc antibodies. As shown in Fig. 3A, at pro-metaphase I and metaphase I stages, the Myc-SET $\beta$  signals were detected adjacent to the CREST signals (Fig. 3Aa,b). At the metaphase II stage, when Myc-SET $\beta$  was at both the inner centromere and kinetochores, we could clearly see that the Myc-SET $\beta$  signals at the inner centromere area were just between the two CREST signals of the sister chromatids, while the Myc-SET $\beta$  signals at kinetochores partly overlapped with CREST signals (Fig. 3Ac). We further investigated the colocalization of Myc-SET $\beta$  with CREST and another well-known centromeric protein, Bub3, after chromosome spreading, and the results further confirmed the localization of Myc-SET $\beta$  at the inner centromere area and kinetochores (Fig. 3B).

We then explored the relocation of Myc-SET $\beta$  from the inner centromere to kinetochores at the MII stage. We measured the distance between the sister kinetochores of chromatids with and without Myc-SET $\beta$  relocation (Fig. 4Aa,b). We found that the distance between the two sister kinetochores in those sister chromatids with Myc-SET $\beta$  relocated to the kinetochores ( $2.61 \pm 0.06 \mu\text{m}$ ,  $n=63$ ) was significantly longer than that in sister chromatids without Myc-SET $\beta$  relocation ( $0.98 \pm 0.05 \mu\text{m}$ ,  $n=56$ ,  $P<0.05$ ; Fig. 4B). The distance between sister kinetochores may reflect the tension on the kinetochores. The relocation of Myc-SET $\beta$  probably results from the pulling force on the kinetochores.

As SET $\beta$  is an inhibitor of PP2A, which is also localized to centromeres, we explored the colocalization of SET $\beta$  with PP2A. We found that Myc-SET $\beta$  partly colocalized with PP2A, which may indicate functional relationships between these two important proteins (Fig. 5).

#### Exogenous overexpression of SET $\beta$ causes precocious segregation of sister chromatids

To investigate the functions of SET $\beta$  in meiosis, exogenous Myc-SET $\beta$  was overexpressed in mouse oocytes. The GV stage

oocytes were injected with a high concentration of exogenous Myc-SET $\beta$  mRNA (about 2.5 mg/ml, 5–10 pl/oocyte), and then arrested for 12 hours by the addition of 2.5  $\mu\text{M}$  milrinone for the expression of Myc-SET $\beta$  protein. The oocytes were then washed and cultured in M16 medium to resume meiosis. Immunoblotting

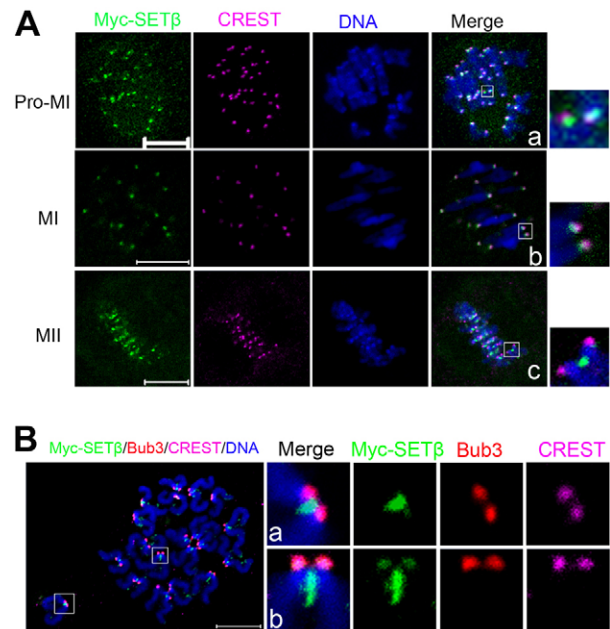

**Fig. 3. Myc-SET $\beta$  localization.** (A) Colocalization of Myc-SET $\beta$  with CREST at Pro-MI, MI and MII stages. Oocytes were injected with a low concentration of Myc-SET $\beta$  mRNA and cultured to Pro-MI, MI and MII stages, then fixed and double stained with anti-Myc antibody (green) and CREST (purple), and DNA (blue) was counterstained with Hoechst 33342. (B) Colocalization of Myc-SET $\beta$ , CREST and Bub3 at MII stage. Oocytes were injected with a low concentration of Myc-SET $\beta$  mRNA and cultured to MII stage, then chromosomes were spread and stained with anti-Myc antibody (green), anti-Bub3 antibody (red) and CREST (purple). DNA (blue) was counterstained with Hoechst 33342. Magnifications of the boxed regions are shown. Scale bars: 10  $\mu$ m.



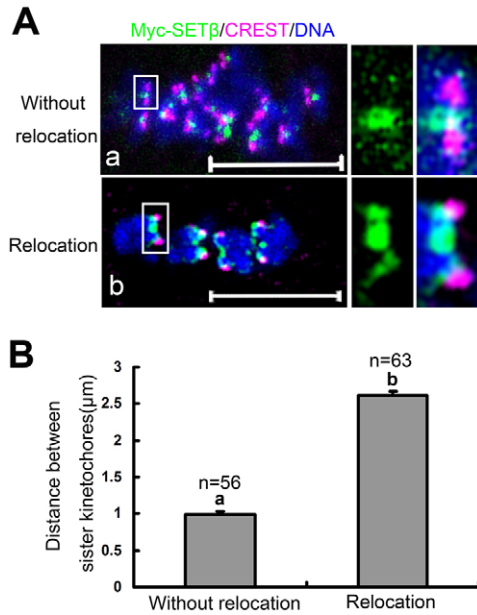

**Fig. 4. Myc-SET $\beta$  relocates towards kinetochores during the MII stage.** (A) The localization pattern of Myc-SET $\beta$  with or without relocation. Oocytes were injected with a low concentration of Myc-SET $\beta$  mRNA and cultured to the MII stage, then fixed and stained with anti-Myc antibody (green) and CREST (purple). DNA (blue) was counterstained with Hoechst 33342. Magnifications of the boxed regions are shown. Scale bars: 10  $\mu$ m. (B) The sister chromatids were categorized as with or without Myc-SET $\beta$  relocation. The distance between two CREST signals (the distance between sister kinetochores) of a pair of sister kinetochores was measured in each of the categorized centromeres. The error bars represent s.e.m. Different superscript letters indicate statistical difference ( $P < 0.05$ ).

analysis was performed to confirm the overexpression of exogenous Myc-SET $\beta$  protein (Fig. 6A). Oocytes in the overexpression group and control group were cultured for 14 hours and then collected for immunofluorescence analysis. In the SET $\beta$ -overexpression group, we observed precocious segregation of sister chromatids at the MII stage in many oocytes (Fig. 6Bb,c), whereas the chromosomes of the control oocytes were all well aligned at the equatorial plates (Fig. 6Ba). To further investigate the precocious separation of sister chromatids after SET $\beta$  overexpression, oocytes of the overexpression group and control group at the MII stage were collected for chromosome spreading analysis. As shown in Fig. 7A, the sister chromatids were closely connected at the centromeres in control oocytes (Fig. 7Aa), but in the overexpression group, the centromeric cohesion of sister chromatids were clearly loosened, and many sister chromatids were precociously segregated and

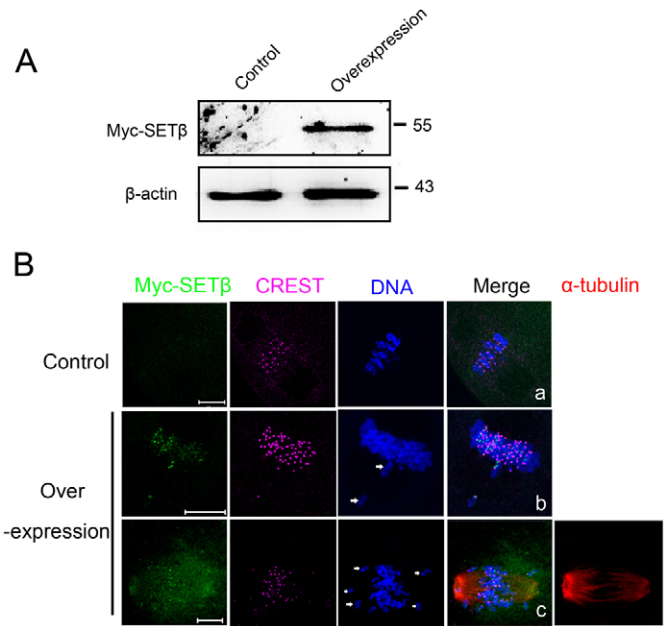

**Fig. 6. SET $\beta$  overexpression leads to precocious separation of sister chromatids.** (A) Expression of exogenous Myc-SET $\beta$  in oocytes injected with Myc-SET $\beta$  mRNA: oocytes in the overexpression group were injected with a high concentration of Myc-SET $\beta$  mRNA, and oocytes of the control group were injected with nuclease-free water. The oocytes were arrested for 12 hours in 2.5  $\mu$ M Milrinone for the expression of mRNA, and then collected for western blot analysis. 100 oocytes were collected per sample. The exogenous Myc-SET $\beta$  was detected with anti-Myc antibody. (B) Oocytes were injected with nuclease-free water or a high concentration of Myc-SET $\beta$  mRNA. The oocytes were arrested for 12 hours in 2.5  $\mu$ M Milrinone for the expression of mRNA, and then released and cultured to the MII stage. The oocytes were fixed and stained with anti-Myc antibody (green), CREST (purple) and anti- $\alpha$ -tubulin (red). DNA (blue) was counterstained with Hoechst 33342. Arrows indicate the precociously separated chromatids. Scale bars: 10  $\mu$ m.

became univalents (Fig. 7Ab,c). Moreover, Myc-SET $\beta$  was no longer localized at the inner centromere areas in the precociously separated chromatids. We calculated the rate of precocious separation of sister chromatids (PSSC) in the overexpression group and control group. The PSSC rate of the overexpression group was  $51.58 \pm 11.68\%$  ( $n = 108$ ), which was significantly higher than that of the control group, which was only  $7.77 \pm 2.54\%$  ( $n = 112$ ,  $P < 0.01$ ; Fig. 7B).

To investigate the causes of premature separation of sister chromatids, we then observed oocytes at anaphase I after SET $\beta$  overexpression. As shown in Fig. 7C, the precocious separation of sister chromatids had already occurred at anaphase of first

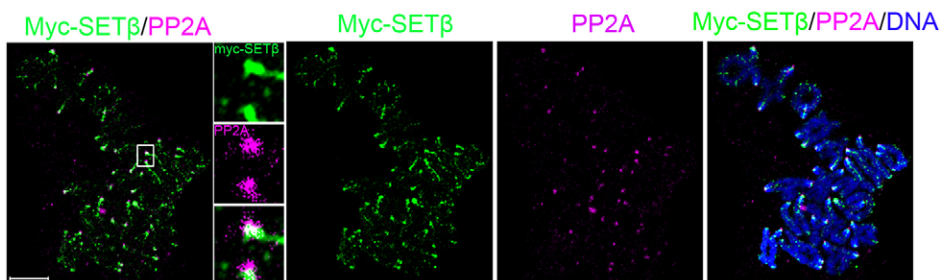

**Fig. 5. Colocalization of Myc-SET $\beta$  with PP2A at the MI stage.** Oocytes were injected with a low concentration of Myc-SET $\beta$  mRNA and cultured to the MI stage, then fixed and double stained with anti-Myc antibody (green) and anti-PP2A-A antibody (purple), and DNA (blue) was counterstained with Hoechst 33342. Magnifications of the boxed regions are shown. Scale bar: 10  $\mu$ m.

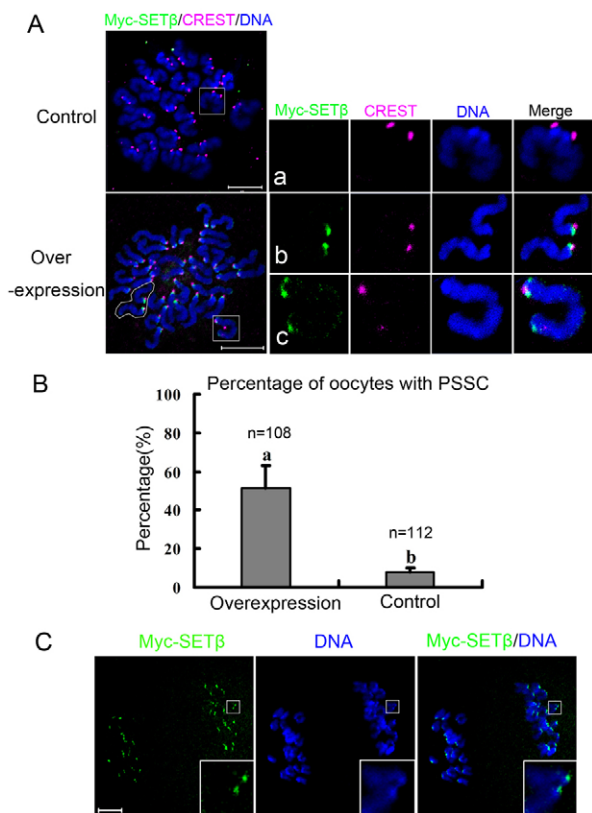

**Fig. 7. SET $\beta$  overexpression leads to precocious separation of sister chromatids.** (A) Oocytes were injected with nuclease-free water or a high concentration of Myc-SET $\beta$  mRNA. The oocytes were arrested for 12 hours in 2.5  $\mu$ M Milrinone for the expression of mRNA, and then released and cultured to the MII stage. Chromosomes were spread and stained with anti-Myc antibody (green) and CREST (purple). DNA (blue) was counterstained with Hoechst 33342. Magnifications of the boxed regions are shown. Scale bars: 10  $\mu$ m. (B) Percentage of oocytes with precocious separation of sister chromatids (PSSC) in the overexpression group ( $n=108$ ) and control group ( $n=112$ ). Data are presented as means  $\pm$  s.e.m. Different superscript letters indicate statistical difference ( $P<0.05$ ). (C) The premature segregation of sister chromatids is initiated at anaphase I. Oocytes were injected with high concentration of Myc-SET $\beta$  mRNA and cultured to the anaphase I stage. The oocytes were fixed and stained with anti-Myc antibody (green), and DNA (blue) was counterstained with Hoechst 33342. Magnifications of the boxed regions are shown. Scale bar: 10  $\mu$ m.

meiosis, with the disappearance of the centromeric localization of Myc-SET $\beta$  (Fig. 7C).

Taken together, these results show that SET $\beta$  overexpression leads to significant precocious separation of sister chromatids during meiosis I.

#### SET $\beta$ RNAi has little effect on the meiotic process

To further investigate the roles of SET $\beta$  in mouse oocyte meiosis, siRNAs were used to knockdown the expression of SET $\beta$ . The efficiency of RNAi was measured by real-time quantitative PCR. Two siRNA oligonucleotides were used, and the real-time PCR results indicated significantly reduced mRNA levels after siRNAs injection ( $9.2\pm 1\%$  of siRNA1 and  $10.7\pm 2\%$  of siRNA2,  $P<0.01$ ; Fig. 8A). siRNA1 was selected for further experiments. Immunoblotting analysis was also performed to confirm the knockdown of SET $\beta$  protein (Fig. 8B). siRNA1 was

injected into oocytes at the GV stage and the same amount of negative control siRNA was injected as a control. The oocytes were arrested in 2.5  $\mu$ M Milrinone-containing M2 medium for 24 hours and then released into fresh M16 medium to resume meiosis. Immunofluorescence analysis with SET $\beta$  antibody after chromosome spreading showed a remarkable reduction of SET $\beta$  signals on kinetochores after SET $\beta$  RNAi (Fig. 8C). The rates of the first polar body extrusion (PBE) were calculated after cultured for 14 hours. No significant difference in PBE was observed between the RNAi group ( $78.4\pm 4.86\%$ ,  $n=428$ ) and the control group ( $82.14\pm 3.06\%$ ,  $n=343$ ,  $P>0.05$ ; Fig. 8D). To further explore whether SET $\beta$  is involved in meiosis II exit, the SET $\beta$  and control-siRNA-injected oocytes were cultured to MII stage and then treated with 10  $\mu$ M calcium ionophore A23187 plus 10  $\mu$ g/ml cycloheximide to activate the meiosis-II-arrested oocytes. Three hours after the parthenogenetic activation, the oocytes were fixed and stained with  $\alpha$ -tubulin and Hoechst33342 to show the separation of sister chromatids. We found that both the RNAi-treated group and control group oocytes entered into anaphase/telophase II normally (Fig. 8E,F). We also investigated chromosome segregation after SET $\beta$  knockdown for both divisions (meiosis I and meiosis II). MII oocytes and artificially activated MII oocytes after SET $\beta$  knockdown were collected and chromosome spreads were performed to show the pattern and number of chromosomes. However, both the RNAi-treated group and control group showed normal chromosome shape and number (Fig. 9A,B), which indicated that SET $\beta$  knockdown had little effect on chromosome separation at both meiosis I and meiosis II.

#### Discussion

In this study, we have investigated the expression, localization and potential functions of SET $\beta$  during mouse oocyte meiotic maturation. We demonstrated that SET $\beta$  localized around centromeres of sister chromatids and the overexpression of SET $\beta$  causes precocious segregation of sister chromatids, but SET $\beta$  RNAi has little effect on the meiotic process.

According to previous reports, SET $\beta$  is a nuclear protein (Canela et al., 2003), but it can also localize to the cytoplasm (Fan et al., 2002) and, at times, to endoplasmic reticulum (Beresford et al., 2001). In our study, we used both SET $\beta$  antibody and Myc-tagged SET $\beta$  mRNA microinjection to detect the localization of endogenous and exogenous SET $\beta$  in intact oocytes and spread chromosomes. We found SET $\beta$  mainly at the inner centromere area, with faint localization along interstitial axes of chromosomes during the first meiosis. At the MII stage, SET $\beta$  was present at the kinetochores, in addition to the inner centromere area. The localization pattern of SET $\beta$  and Myc-SET $\beta$  at the inner centromere area and along interstitial axes of chromosomes was similar to that of rec8 protein (Lee et al., 2006), a core protein of the cohesin complex, which may imply a functional relationship between SET $\beta$  and the cohesin complex. According to previous reports on cohesin localization and the high similarity of the localization pattern of the cohesin complex and SET $\beta$ , it is highly possible that SET $\beta$  participates in the regulation of cohesin and chromosome segregation.

The double staining of Myc-SET $\beta$  with CREST, a reliable centromere marker indicated that at first prometaphase (pro-MI) and MI stages, Myc-SET $\beta$  localized at the inner centromere area, just adjacent to the CREST signals (Fig. 3Aa,b), and at the MII stage, Myc-SET $\beta$  signals at the inner centromere area and

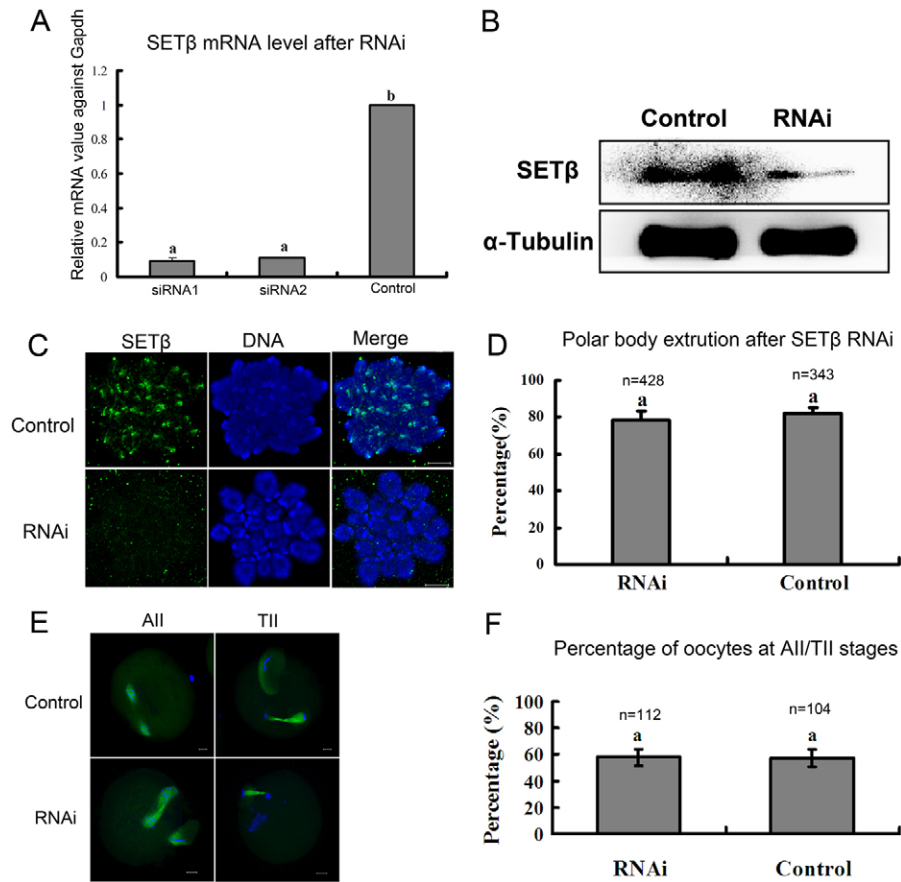

**Fig. 8. SETβ depletion has little effect on the meiotic maturation process.** (A) The knockdown efficiency of SETβ siRNA1 and siRNA2. Analysis of relative gene expression was measured using real-time quantitative PCR. Data are presented as mean  $\pm$  s.e.m. Different superscript letters indicate statistical difference ( $P < 0.05$ ). (B) Samples from control and RNAi groups were collected to test the efficiency of SETβ RNAi. Oocytes of the RNAi group were injected with 30  $\mu$ M siRNA1, and oocytes of the control group were injected with 30  $\mu$ M control siRNA. The oocytes were arrested for 24 hours in 2.5  $\mu$ M Milrinone for knockdown of SETβ, and then collected for western blot analysis. A total of 200 oocytes were collected per sample. (C) Oocytes in the RNAi group and control group were cultured to MI stage and chromosomes were spread and stained with anti-SETβ antibody (green) and Hoechst 33342 (blue). Clear SETβ signal was found on kinetochores in control groups, in contrast to the dramatic reduction in the RNAi groups. Scale bars: 10  $\mu$ m. (D) Percentage of polar body extrusion (PBE) after SETβ depletion. SETβ siRNA1- and control siRNA-injected oocytes were cultured for 16 hours, and the rates of polar body extrusion were calculated. Data are presented as means  $\pm$  s.e.m. Same superscript letters indicate no statistical difference ( $P > 0.05$ ). (E) Oocytes in the RNAi group and control group were cultured to MII stage and parthenogenetically activated with 10  $\mu$ M calcium ionophore A23187 combined with 10  $\mu$ g/ml cycloheximide. Three hours after parthenogenetic activation, oocytes were collected and stained with anti- $\alpha$ -tubulin (green) and Hoechst 33342 (Blue). Scale bars: 10  $\mu$ m. (F) Percentage of oocytes entering second anaphase/second telophase (AII/TII) stages 3 hours after parthenogenetic activation in RNAi and control groups. Data were presented as means  $\pm$  s.e.m. Same superscript letters indicate no statistical difference ( $P > 0.05$ ).

kinetochores were in-between and overlapped with the two CREST signals of sister chromatids, which provides direct evidence for the localization of SETβ at the inner centromere area and kinetochores. Bub3, another well-known kinetochore protein (Li et al., 2009), has also been employed to confirm the localization of SETβ.

We further explored the relocation of SETβ from the inner centromere area to kinetochores and found that the relocation of SETβ was accompanied by an increase in the distance between sister kinetochores. It is known that the distance between sister kinetochores is a reflection of tension on kinetochores, and thus we propose that the relocation of SETβ from the inner centromere area to kinetochores may be the result of pulling forces on kinetochores. Furthermore, a previous study in mouse oocytes showed a relocation pattern of both SGO1 and SGO2 from the inner centromere area to kinetochores at the MII stage

(Lee et al., 2008) as a result of tension on the kinetochores, which was very similar to the situation determined for SETβ. SETβ has been reported to physically interact with both SGO1 and SGO2 (Kitajima et al., 2006), and it would be interesting to investigate the interaction between SETβ and shugoshin in meiosis. However, because shugoshin antibody was not available, it was difficult for us to pursue this investigation.

It is known that SAC (spindle assembly checkpoint) proteins, such as Mad2 and Bub3 are localized to kinetochores and play an important role in meiosis (Li et al., 2009; Sikora-Polaczek et al., 2006). Because of the kinetochore localization of SETβ, it is tempting to consider a correlation between SETβ and SAC proteins. A previous study showed that Mad2 localized to kinetochores at early MII stage but disappeared gradually from chromosomes later, which indicated that spindle assembly checkpoint was gradually switching off, and the arrest of MII



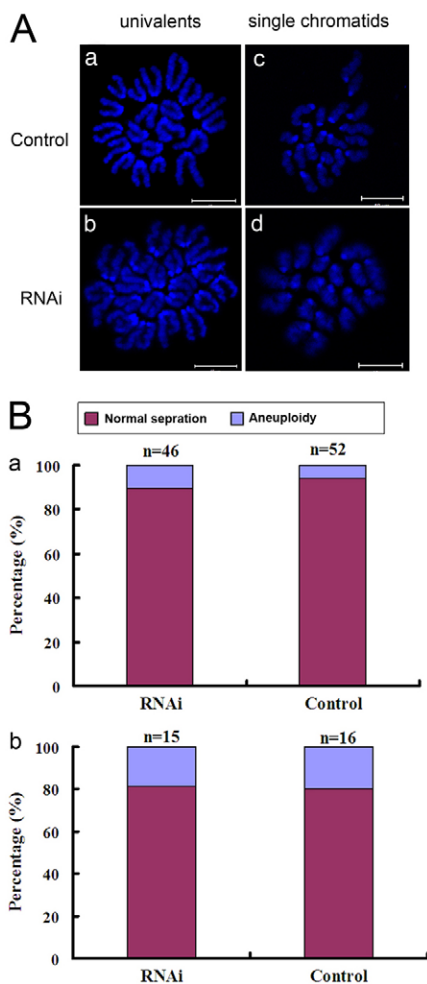

**Fig. 9.** SET $\beta$  knockdown has little effect on chromosome segregation for both meiosis I and meiosis II. (A) Chromosome spreads of oocytes in control and RNAi groups after meiosis I and meiosis II. Typical chromosomes at MII stage were univalents (a,b) and typical chromosomes after meiosis II were single chromatids (c,d). DNA was stained with Hoechst 33342 (Blue). Scale bars: 10  $\mu$ m. (B) Percentage of oocytes with aneuploidy after meiosis I (a) and meiosis II (b) in RNAi and control groups.

was maintained by CSF alone (Sikora-Polaczek et al., 2006; Tsurumi et al., 2004). It was worthwhile, therefore, to explore the potential correlation between SET $\beta$  relocation and Mad2 disappearance from kinetochores, which may provide a link between SET $\beta$  and the spindle assembly checkpoint. However, owing to the lack of an available working Mad2 antibody, it was hard for us to investigate the correlation between SET $\beta$  and Mad2. However, we have explored the colocalization of SET $\beta$  with Bub3, another important SAC protein. We found that at early MII stage, SET $\beta$  localized between the two Bub3 spots (Fig. 3Ba), but when SET $\beta$  relocated from the inner kinetochore to the outer kinetochore, the localization of SET $\beta$  and Bub3 partly overlapped (Fig. 3Bb), which may imply the functional correlation between SET $\beta$  and SAC proteins.

It has been reported that SET $\beta$  is a potential inhibitor of PP2A. It is known that in meiosis, shugoshin localizes to centromeres and recruits PP2A to antagonize phosphorylation of the rec8 protein; we thus propose that SET $\beta$  may participate in the

regulation of shugoshin–PP2A-mediated cohesion protection. We investigated the colocalization of SET $\beta$  with PP2A and found that the localization of SET $\beta$  and PP2A partly overlapped (Fig. 5), which implied a possible functional relationship between SET $\beta$  and PP2A. As centromeric PP2A protects cohesin from phosphorylation, whereas SET $\beta$  is an inhibitor of PP2A, we propose that modulation of SET $\beta$  may affect chromosome separation. Indeed, overexpression of SET $\beta$  led to precocious separation of sister chromatids (Fig. 6B; Fig. 7A,B), which provided direct evidence that SET $\beta$  can negatively regulate cohesion protection and chromosome segregation. We propose that overexpressed SET $\beta$  inhibited PP2A activity at the inner centromere area, resulting in the loss of rec8 protein protection by shugoshin–PP2A, and thus cohesin was phosphorylated and then cleaved by separase at the onset of anaphase. Moreover, the precociously separated sister chromatids lost SET $\beta$  localization at the inner centromere area, which may indicate that the localization of SET $\beta$  at the inner centromere area depends on intact cohesion.

It is surprising that knockdown of SET $\beta$  by RNAi did not produce any significant effects. However, in our study, we focused mainly on the process from the GV stage to the MII stage, which is only part of the meiotic process, so it is not clear whether SET $\beta$  participates in other meiotic events. The fact that the RNAi of SET $\beta$  does not cause obvious chromosome segregation phenotypes suggests that it may not physiologically regulate chromosome separation in mouse oocyte meiosis. The overexpression phenotype could be a non-physiological effect of inhibition of PP2A.

In conclusion, our data suggest that SET $\beta$ , a PP2A inhibitor, is a centromeric protein in oocytes and that overexpression of SET $\beta$  causes precocious chromatid segregation, but SET $\beta$  itself may not be physiologically essential for chromosome separation during mouse oocyte meiotic maturation.

## Materials and Methods

All chemicals and media were purchased from Sigma Chemical Company (St. Louis, MO) unless stated otherwise.

### Antibodies

Rabbit polyclonal anti-SET $\beta$ , rabbit polyclonal anti-Bub3, mouse monoclonal anti- $\beta$ -actin antibodies were purchased from Santa Cruz Biotechnology (Santa Cruz, CA); mouse monoclonal anti-Myc-FITC antibody was purchased from Invitrogen (Carlsbad, CA); rabbit monoclonal anti- $\alpha$ -tubulin and rabbit polyclonal anti-PP2A-A antibodies were obtained from Cell Signaling Technology (Beverly, MA); CREST, human anti-centromere antibody was purchased from Fitzgerald (Acton, MA); FITC-conjugated goat anti-rabbit IgG and TRITC-conjugated goat anti-rabbit IgG were purchased from Zhongshan Golden Bridge Biotechnology Co, LTD (Beijing). Cy5-conjugated goat anti-human IgG and Cy5-conjugated goat anti-rabbit IgG were purchased from Jackson ImmunoResearch Laboratory (West Grove, PA).

### Oocyte collection and culture

Animal care and handling were conducted in accordance with Animal Research Committee policies of the Institute of Zoology, Chinese Academy of Sciences. Female ICR mice 6- to 8-weeks old were sacrificed and the ovaries were isolated, then cut with a blade to release immature oocytes. Only those immature oocytes with an intact germinal vesicle (GV) were selected for further experiments. For mRNA or siRNA injection, GV oocytes were maintained at the GV stage by supplementing the M2 medium with 2.5  $\mu$ M milrinone. For *in vitro* maturation, GV oocytes were cultured in M16 medium under liquid paraffin oil at 37°C in a 5% CO<sub>2</sub> incubator.

### SET $\beta$ plasmid construction and mRNA synthesis

Total RNA was extracted from 100 GV-stage mouse oocytes using an RNeasy micro purification kit (Qiagen), and the first strand cDNA was generated with an M-MLV first strand cDNA synthesis kit (Invitrogen), using oligo(dT) primers. The

following two pairs of nest primers were used to amplify the full-length CDS sequence of mouse SET $\beta$  by PCR. F1: 5'-TGTGGCGTGAGGGGAAGC-3'; R1: 5'-CAGAGGGACAGGGAGGAAAGG-3'; F2: 5'-GTTGGCCGCGCCGACCATG-TCTGCGCCGA-3'; R2: 5'-GTTGGCGCGCCGCTAATCATCTCGCCTTC-3'. The PCR products were purified, then digested using *FseI* and *AseI* (New England Biolabs, Inc.) and cloned into the pCS2+ vector, in which the SET $\beta$  sequence was linked to six Myc tags at its N-terminus.

For the synthesis of Myc-tagged SET $\beta$  mRNA, the SET $\beta$ -pCS2+ plasmids were linearized by *SalI* and then purified. The SP6 mMESSAGE mMACHINE (Ambion) was used to produce capped mRNA and then purified by RNeasy clean up kit (Qiagen). The concentration was detected with a Beckman DU 530 Analyzer, and diluted to a concentration of 0.4 mg/ml for localization and 2.5 mg/ml for overexpression.

#### Micro-injection of Myc-SET $\beta$ mRNA of SET $\beta$ siRNAs

Microinjections were performed using a Narishige microinjector and completed within 30 minutes. For Myc-SET $\beta$  expression, 0.4 mg/ml (or 2.5 mg/ml for overexpression) Myc-SET $\beta$  mRNA solution was injected into cytoplasm of GV oocytes. For protein expression, oocytes were arrested at the GV stage in M2 medium supplemented with 2.5  $\mu$ M milrinone for 2 hours. The same amount of RNase-free water was injected as control.

For knockdown experiments, small interfering RNAs (siRNAs) of SET $\beta$  (GenePharma) were microinjected into the cytoplasm to deplete SET $\beta$ . The subsequent siRNAs were used at 30  $\mu$ M, SET $\beta$  siRNA-1: 5'-CCACCGAAA-UCAAAUGGAATT-3'; SET $\beta$  siRNA-2: 5'-GAGGAUGAUUAGCACAGAATT-3'. The same amount of negative control siRNA was used as control. After siRNA injection, oocytes were arrested at the GV stage in M16 medium supplemented with 2.5  $\mu$ M milrinone for 24 hours for the depletion of SET $\beta$ .

#### Western blotting

A total of 200 mouse oocytes at the appropriate stage of meiotic maturation were collected and transferred to 5  $\mu$ l 2 $\times$  SDS sample buffer and boiled for 5 min. The samples were separated by SDS-PAGE and then transferred to PVDF membranes. After transfer, the membranes were washed briefly in TBST buffer and then blocked in TBST containing 5% skimmed milk, for 1 hour at room temperature, followed by incubation overnight at 4 $^{\circ}$ C with 1:500 rabbit polyclonal anti-SET $\beta$  antibody, 1:2000 mouse monoclonal anti-Myc antibody or 1:2000 mouse monoclonal anti- $\beta$ -actin antibody. After three washes in TBST buffer, 10 minutes each, the membranes were incubated with 1:1000 HRP-conjugated goat anti-rabbit IgG or HRP-conjugated goat anti-mouse IgG, for 2 hours at room temperature. Finally, the membranes were washed three times in TBST and processed using the enhanced chemiluminescence detection system (Bio-Rad, CA).

#### Immunofluorescence analysis and chromosome spread

Oocytes were fixed in 4% paraformaldehyde in PBS buffer with 0.5% Triton X-100 for 30 minutes and then blocked in 1% BSA-supplemented PBS for 1 hour at room temperature. For single staining of Myc-SET $\beta$ , oocytes were incubated with FITC-conjugated anti-Myc antibody (1:100) overnight at 4 $^{\circ}$ C, and after three washes in washing buffer (0.1% Tween 20 and 0.01% Triton X-100 in PBS), DNA was stained with Hoechst 33342 for 30 minutes.

For double staining of Myc-SET $\beta$  and CREST, oocytes were first stained with CREST (1:50) overnight at 4 $^{\circ}$ C, and after three washes in washing buffer, oocytes were incubated with cy5-conjugated goat anti-human secondary antibody for 2 hours at room temperature, then washed three times and blocked again for 1 hour at room temperature and then incubated with FITC-conjugated monoclonal anti-Myc antibodies for 2 hours at room temperature. The oocytes were finally stained with Hoechst 33342 after three washes in washing buffer and mounted on glass slides for immunofluorescence microscopy. The photos were taken with the confocal laser-scanning microscope (Zeiss LSM 780, Germany).

Chromosome spreads were performed as described previously (Hodges and Hunt, 2002). Briefly, the oocytes were exposed in acid Tyrode's solution (Sigma) for 1 minute at 37 $^{\circ}$ C to remove the zona pellucida. After a brief recovery in M2 medium, the oocytes were transferred onto glass slides and fixed in a solution of 1% paraformaldehyde in distilled H<sub>2</sub>O (pH 9.2) containing 0.15% Triton X-100 and 3 mM dithiothreitol. The slides were allowed to dry slowly in a humid chamber for several hours, and then blocked with 1% BSA in PBS for 1 hour at room temperature. The oocytes were then incubated with CREST (1:50), anti-SET $\beta$ , anti-Myc (1:50), anti-Bub3 (1:50) or anti-PP2A (1:50) primary antibodies overnight at 4 $^{\circ}$ C. After brief washes with washing buffer, the slides were then incubated with the corresponding secondary antibodies for 2 hours at room temperature. DNA on the slides was stained with Hoechst 33342 and slides were mounted for observation by immunofluorescence microscopy.

#### Real-time quantitative PCR analysis

Total RNA was extracted from 50 oocytes using RNeasy micro purification kit (Qiagen), the first strand cDNA was generated with M-MLV first strand cDNA synthesis kit (Invitrogen), using oligo(dT) primers. The following primers were

used to amplify the SET $\beta$  fragment. Forward: 5'-CCTACCTGCTCCCACCGTTA-3'; Reverse: 5'-CACTGACTGCTGACCCTGACA-3'; GAPDH was selected as a reference gene. We used a SYBR Premix Ex Tag<sup>TM</sup> kit (Takara) in an ABI prism 7500 Sequence Detection System. The steps consisted of 95 $^{\circ}$ C for 15 seconds, 40 cycles of 95 $^{\circ}$ C for 5 seconds and 60 $^{\circ}$ C for 30 seconds. Relative gene expression was calculated by the  $2^{-\Delta\Delta Ct}$  method.

#### Parthenogenetic activation

Oocytes were cultured for 15 hours to develop to MII stage, and parthenogenetically activated using 10  $\mu$ M calcium ionophore A23187 in KSOM at room temperature for 5 min, followed by incubation in 10  $\mu$ g/ml cycloheximide in KSOM medium under liquid paraffin oil at 37 $^{\circ}$ C in a 5% CO<sub>2</sub> incubator.

#### Statistical analysis

All experiments were repeated at least three times. All percentage are expressed as means  $\pm$  s.e.m. and the number of oocytes observed (*n*) given in parentheses. Data were analyzed by independent-sample *t*-tests with SPSS software (SPSS Inc., Chicago, IL). *P* < 0.05 was considered statistically significant.

#### Acknowledgements

We are grateful to Shi-wen Li and Hua Qin for their technical assistance and Hui Zou for his helpful suggestions.

#### Author contributions

S.-T.Q. and Q.-Y.S. conceived and designed the experiments. S.-T.Q., Z.-B.W., Y.-C.O., Q.-H.Z., M.-W.H., X.H., Z.G., L.G. and Y.-P.W. performed the experiments. S.-T.Q., Z.-B.W. and Q.-Y.S. analysed the data. Y.H. contributed reagents, materials and analysis tools. S.-T.Q., H.S. and Q.-Y.S. wrote the paper.

#### Funding

This study was supported by the Major Basic Research Program [grant numbers 2012CB944404, 2011CB944501 to Q.-Y.S.]; and the National Natural Science Foundation of China [grant number 30930065 to Q.Y.S.].

#### References

- Adachi, Y., Pavlakis, G. N. and Copeland, T. D. (1994). Identification and characterization of SET, a nuclear phosphoprotein encoded by the translocation break point in acute undifferentiated leukemia. *J. Biol. Chem.* **269**, 2258-2262.
- Beresford, P. J., Zhang, D., Oh, D. Y., Fan, Z., Greer, E. L., Russo, M. L., Jaju, M. and Lieberman, J. (2001). Granzyme A activates an endoplasmic reticulum-associated caspase-independent nuclease to induce single-stranded DNA nicks. *J. Biol. Chem.* **276**, 43285-43293.
- Buonomo, S. B. C., Clyne, R. K., Fuchs, J., Loidl, J., Uhlmann, F. and Nasmyth, K. (2000). Disjunction of homologous chromosomes in meiosis I depends on proteolytic cleavage of the meiotic cohesin Rec8 by separin. *Cell* **103**, 387-398.
- Canela, N., Rodriguez-Villarupla, A., Estanyol, J. M., Diaz, C., Pujol, M. J., Agell, N. and Bachs, O. (2003). The SET protein regulates G2/M transition by modulating cyclin B-cyclin-dependent kinase 1 activity. *J. Biol. Chem.* **278**, 1158-1164.
- Cowchock, F. S., Gibas, Z. and Jackson, L. G. (1993). Chromosome errors as a cause of spontaneous abortion: the relative importance of maternal age and obstetric history. *Fertil. Steril.* **59**, 1011-1014.
- Fan, Z., Beresford, P. J., Zhang, D. and Lieberman, J. (2002). HMG2 interacts with the nucleosome assembly protein SET and is a target of the cytotoxic T-lymphocyte protease granzyme A. *Mol. Cell. Biol.* **22**, 2810-2820.
- Gruber, S., Haering, C. H. and Nasmyth, K. (2003). Chromosomal cohesin forms a ring. *Cell* **112**, 765-777.
- Hassold, T. and Hunt, P. (2001). To err (meiotically) is human: the genesis of human aneuploidy. *Nat. Rev. Genet.* **2**, 280-291.
- Hassold, T., Abruzzo, M., Adkins, K., Griffin, D., Merrill, M., Millie, E., Saker, D., Shen, J. and Zaragoza, M. (1996). Human aneuploidy: incidence, origin, and etiology. *Environ. Mol. Mutagen.* **28**, 167-175.
- Hodges, C. A. and Hunt, P. A. (2002). Simultaneous analysis of chromosomes and chromosome-associated proteins in mammalian oocytes and embryos. *Chromosoma* **111**, 165-169.
- Ishiguro, T., Tanaka, K., Sakuno, T. and Watanabe, Y. (2010). Shugoshin-PP2A counteracts casein-kinase-1-dependent cleavage of Rec8 by separase. *Nat. Cell Biol.* **12**, 500-506.
- Kitajima, T. S., Kawashima, S. A. and Watanabe, Y. (2004). The conserved kinetochore protein shugoshin protects centromeric cohesion during meiosis. *Nature* **427**, 510-517.
- Kitajima, T. S., Hauf, S., Ohsugi, M., Yamamoto, T. and Watanabe, Y. (2005). Human Bub1 defines the persistent cohesion site along the mitotic chromosome by affecting Shugoshin localization. *Curr. Biol.* **15**, 353-359.



- Kitajima, T. S., Sakuno, T., Ishiguro, K., Iemura, S., Natsume, T., Kawashima, S. A. and Watanabe, Y. (2006). Shugoshin collaborates with protein phosphatase 2A to protect cohesin. *Nature* **441**, 46-52.
- Klein, F., Mahr, P., Galova, M., Buonomo, S. B. C., Michaelis, C., Nairz, K. and Nasmyth, K. (1999). A central role for cohesins in sister chromatid cohesion, formation of axial elements, and recombination during yeast meiosis. *Cell* **98**, 91-103.
- Lee, J. Y. and Orr-Weaver, T. L. (2001). The molecular basis of sister-chromatid cohesion. *Annu. Rev. Cell Dev. Biol.* **17**, 753-777.
- Lee, J., Iwai, T., Yokota, T. and Yamashita, M. (2003). Temporally and spatially selective loss of Rec8 protein from meiotic chromosomes during mammalian meiosis. *J. Cell Sci.* **116**, 2781-2790.
- Lee, J., Okada, K., Ogushi, S., Miyano, T., Miyake, M. and Yamashita, M. (2006). Loss of Rec8 from chromosome arm and centromere region is required for homologous chromosome separation and sister chromatid separation, respectively, in mammalian meiosis. *Cell Cycle* **5**, 1448-1455.
- Lee, J., Kitajima, T. S., Tanno, Y., Yoshida, K., Morita, T., Miyano, T., Miyake, M. and Watanabe, Y. (2008). Unified mode of centromeric protection by shugoshin in mammalian oocytes and somatic cells. *Nat. Cell Biol.* **10**, 42-52.
- Leung, J. W., Leitch, A., Wood, J. L., Shaw-Smith, C., Metcalfe, K., Bicknell, L. S., Jackson, A. P. and Chen, J. (2011). SET nuclear oncogene associates with microcephalin/MCPH1 and regulates chromosome condensation. *J. Biol. Chem.* **286**, 21393-21400.
- Li, M. and Damuni, Z. (1998). I1PP2A and I2PP2A. Two potent protein phosphatase 2A-specific inhibitor proteins. *Methods Mol. Biol.* **93**, 59-66.
- Li, M., Makkinje, A. and Damuni, Z. (1996). The myeloid leukemia-associated protein SET is a potent inhibitor of protein phosphatase 2A. *J. Biol. Chem.* **271**, 11059-11062.
- Li, M., Li, S., Yuan, J., Wang, Z. B., Sun, S. C., Schatten, H. and Sun, Q. Y. (2009). Bub3 is a spindle assembly checkpoint protein regulating chromosome segregation during mouse oocyte meiosis. *PLoS ONE* **4**, e7701.
- Mailhes, J. B., Young, D. and London, S. N. (1998). Postovulatory ageing of mouse oocytes in vivo and premature centromere separation and aneuploidy. *Biol. Reprod.* **58**, 1206-1210.
- Michaelis, C., Ciosk, R. and Nasmyth, K. (1997). Cohesins: chromosomal proteins that prevent premature separation of sister chromatids. *Cell* **91**, 35-45.
- Nasmyth, K. (2002). Segregating sister genomes: the molecular biology of chromosome separation. *Science* **297**, 559-565.
- Petronczki, M., Siomos, M. F. and Nasmyth, K. (2003). Un ménage à quatre: the molecular biology of chromosome segregation in meiosis. *Cell* **112**, 423-440.
- Riedel, C. G., Katis, V. L., Katou, Y., Mori, S., Itoh, T., Helmhart, W., Gálová, M., Petronczki, M., Gregan, J. and Cetin, B. (2006). Protein phosphatase 2A protects centromeric sister chromatid cohesion during meiosis I. *Nature* **441**, 53-61.
- Seo, S. B., McNamara, P., Heo, S., Turner, A., Lane, W. S. and Chakravarti, D. (2001). Regulation of histone acetylation and transcription by INHAT, a human cellular complex containing the set oncoprotein. *Cell* **104**, 119-130.
- Sikora-Polaczek, M., Hupalowska, A., Polanski, Z., Kubiak, J. Z. and Ciemerych, M. A. (2006). The first mitosis of the mouse embryo is prolonged by transitional metaphase arrest. *Biol. Reprod.* **74**, 734-743.
- Tsurumi, C., Hoffmann, S., Geley, S., Graeser, R. and Polanski, Z. (2004). The spindle assembly checkpoint is not essential for CSF arrest of mouse oocytes. *J. Cell Biol.* **167**, 1037-1050.
- Watanabe, Y. and Nurse, P. (1999). Cohesin Rec8 is required for reductional chromosome segregation at meiosis. *Nature* **400**, 461-464.
- Yin, S., Ai, J. S., Shi, L. H., Wei, L., Yuan, J., Ouyang, Y. C., Hou, Y., Chen, D. Y., Schatten, H. and Sun, Q. Y. (2008a). Shugoshin1 may play important roles in separation of homologous chromosomes and sister chromatids during mouse oocyte meiosis. *PLoS ONE* **3**, e3516.
- Yin, S., Sun, X. F., Schatten, H. and Sun, Q. Y. (2008b). Molecular insights into mechanisms regulating faithful chromosome separation in female meiosis. *Cell Cycle* **7**, 2997-3005.
- Zenzen, M. T. and Casper, R. F. (1992). Cytogenetics of human oocytes, zygotes, and embryos after in vitro fertilization. *Hum. Genet.* **88**, 367-375.
